# Supplementary material for: CoreSimul: a forward-in-time simulator of genome evolution for prokaryotes modeling homologous recombination
Source: PubMed Central journal article supplement (PMC7315543; doi:10.1186/s12859-020-03619-x), 2020-06-24

$r/m$  (ClonalFrameML)

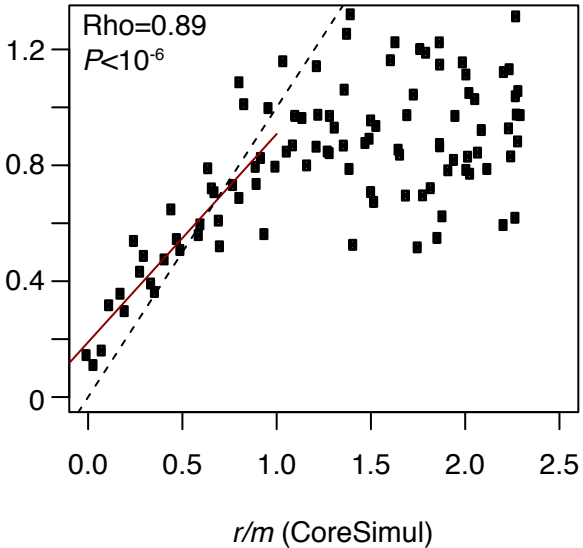

Supplement: 12859_2020_3619_MOESM1_ESM.pdf [file 12859_2020_3619_MOESM1_ESM.pdf]
